# Supplementary material for: Conversion of alpine pastureland to artificial grassland altered CO2 and N2O emissions by decreasing C and N in different soil aggregates
Source: PeerJ. 2021 Jul 14;9:e11807. doi: 10.7717/peerj.11807 (PMC8759380; doi:10.7717/peerj.11807)
Supplement: Supplemental Information 1 [file peerj-09-11807-s001.xlsx]

## Sheet: Table 1
						CK	pH	MWD	GMD	SOC (g kg-1)	TN (g kg-1)
						1	8.2	1.35615	0.908177	50.7321	4.88
						2	8.05	1.43207	1.02848	51.4195	4.98
						3	8.21	1.28633	0.825492	49.9953	5.2
						4	8.17	1.31856	0.870258	47.2126	4.68
						Average	8.1575	1.34828	0.908102	49.8399	4.935
						SD	0.0736546	0.0627278	0.0870782	1.84555	0.216256
						GG
						1	8.11	1.41502	1.06087	52.7502	5.13
						2	8.16	1.19037	0.677648	49.2883	5.34
						3	8.13	1.31601	0.882748	49.5027	4.65
						4	8.17	1.27431	0.824471	54.9879	4.95
						Average	8.1425	1.29893	0.861435	51.6323	5.0175
						SD	0.0275379	0.093378	0.158507	2.74101	0.292276
						GC
						1	8.26	0.822547	0.462672	35.6329	2.89
						2	8.4	0.755039	0.39036	35.1461	3.37
						3	8.29	0.701596	0.367705	33.4214	3.23
						4	8.26	0.771672	0.421522	26.3963	2.64
						Average	8.3025	0.762714	0.410565	32.6492	3.0325
						SD	0.0665207	0.0498479	0.0411519	4.27523	0.33029

## Sheet: Aggregate size distribution
					Aggregate size distribution(%)
				CK	>2	2-0.25	0.25-0.053	<0.053
				1	51.1698	27.3277	14.1334	7.36909
				2	54.4293	28.8416	10.3066	6.42249
				3	47.3115	27.4695	17.9694	7.24961
				4	47.6598	30.2305	13.7618	8.34789
				Average	50.1426	28.4673	14.0428	7.34727
				GG
				1	50.9262	33.4649	11.9192	3.68964
				2	42.5359	27.3774	15.9554	14.1314
				3	47.5031	30.0562	16.1673	6.27341
				4	45.0256	30.6303	16.5588	7.78535
				Average	46.4977	30.3822	15.1502	7.96995
				GC
				1	14.5738	42.2951	32.8852	10.2459
				2	10.6268	43.8025	25.9629	19.6078
				3	9.09395	40.8474	34.1651	15.8935
				4	11.5831	43.0471	32.1669	13.2029
				Average	11.4694	42.498	31.295	14.7375

## Sheet: SOC and TN content
					SOC (g/kg)	TN (g/kg)	C/N ratio
			CK	>2	50.796	5.15	9.86331
				>2	50.9451	4.63	11.0033
				>2	51.452	4.87	10.5651
				>2	49.7775	5.14	9.68433
				Average	50.7426	4.9475	10.279
				2-0.25	55.7921	5.37	10.3896
				2-0.25	53.4323	5.07	10.5389
				2-0.25	56.172	5.3	10.5985
				2-0.25	54.9441	5.15	10.6688
				Average	55.0851	5.2225	10.5489
				0.25-0.053	52.362	4.55	11.5081
				0.25-0.053	50.6443	4.95	10.2312
				0.25-0.053	53.1571	4.27	12.449
				0.25-0.053	50.4672	4.44	11.3665
				Average	51.6577	4.5525	11.3887
				<0.053	35.9212	3.4	10.565
				<0.053	31.7318	3.16	10.0417
				<0.053	33.6694	3.35	10.0506
				<0.053	34.9925	3.52	9.94105
				Average	34.0787	3.3575	10.1496
			GG	>2	53.8552	5.01	10.7495
				>2	55.334	5.15	10.7445
				>2	48.5064	5.03	9.64341
				>2	52.6471	4.94	10.6573
				Average	52.5857	5.0325	10.4487
				2-0.25	58.5262	5.13	11.4086
				2-0.25	60.0288	5.65	10.6246
				2-0.25	51.53	5.38	9.57807
				2-0.25	58.883	5.37	10.9652
				Average	57.242	5.3825	10.6441
				0.25-0.053	48.5498	4.46	10.8856
				0.25-0.053	48.6209	4.85	10.0249
				0.25-0.053	41.9633	4.1	10.2349
				0.25-0.053	53.516	4.68	11.435
				Average	48.1625	4.5225	10.6451
				<0.053	31.7363	3.58	8.86489
				<0.053	36.7963	4.01	9.17615
				<0.053	31.3125	3.17	9.87775
				<0.053	34.0853	3.74	9.11372
				Average	33.4826	3.625	9.25812
			GC	>2	37.4817	3.92	9.56165
				>2	35.9201	3.26	11.0184
				>2	35.0261	3.38	10.3627
				>2	40.6082	3.52	11.5364
				Average	37.259	3.52	10.6198
				2-0.25	38.9711	3.14	12.4112
				2-0.25	38.025	3.27	11.6284
				2-0.25	30.2487	2.96	10.2192
				2-0.25	31.4582	3.2	9.8307
				Average	34.6758	3.1425	11.0224
				0.25-0.053	28.3173	2.65	10.6858
				0.25-0.053	26.9741	3.08	8.75781
				0.25-0.053	28.63	3.18	9.00313
				0.25-0.053	29.3316	2.97	9.87597
				Average	28.3132	2.97	9.58067
				<0.053	26.779	2.63	10.1821
				<0.053	26.2186	2.57	10.2018
				<0.053	24.9519	2.41	10.3535
				<0.053	22.6573	3.06	7.40434
				Average	25.1517	2.6675	9.53543

## Sheet: CO2 fluxes
			CK	Incubation time (Days)	>2mm	>2mm	>2mm	>2mm	2-0.25mm	2-0.25mm	2-0.25mm	2-0.25mm	0.25-0.053mm	0.25-0.053mm	0.25-0.053mm	0.25-0.053mm	<0.053mm	<0.053mm	<0.053mm	<0.053mm
				1	12.3776	12.8627	11.9093	12.3966	14.3162	14.1332	14.7457	14.6832	12.2956	10.5476	12.4156	11.7396	9.56377	8.69373	9.49939	9.59376
				3	23.8786	24.8051	22.994	23.561	27.5276	27.633	28.4215	27.9623	23.2862	20.7929	22.9958	22.947	17.7211	18.4327	18.2941	18.6283
				5	7.99292	8.82664	8.28285	8.71662	12.1661	12.4398	12.4623	12.2386	9.04353	8.76487	9.39389	9.71493	5.57696	5.53367	5.47235	5.40967
				7	5.55492	5.93762	5.88224	5.60784	9.33717	9.6124	8.98114	9.67382	6.88226	5.72022	6.44788	6.78094	3.71856	3.58607	3.46178	3.47696
				9	5.26189	5.01178	5.47712	5.66528	9.83358	10.1681	9.07041	8.64128	5.1724	4.28211	5.36331	5.86123	3.92141	3.59145	3.74564	3.88286
				16	4.04589	3.83444	4.05007	4.01614	6.0507	5.99586	5.99493	6.15086	3.67829	3.65134	3.90926	3.66992	2.22557	2.37567	2.39472	2.07685
				26	3.30203	3.40131	3.02199	3.10628	4.4934	4.26815	4.51447	4.74459	2.87494	2.76208	2.81359	2.5977	2.14345	1.86153	1.93926	1.9697
				36	2.49304	2.61062	2.49257	2.68678	4.09343	4.50376	3.91397	4.02853	2.46353	2.36975	2.32643	2.31977	1.18636	1.55718	1.37867	1.55813
				46	3.06761	3.12886	3.20926	3.43658	4.10418	4.05632	4.15587	3.77204	2.78956	2.75127	2.64264	2.51295	1.50987	1.55821	1.4668	1.58836
				56	2.37492	2.65578	2.07113	2.20392	2.70068	2.61709	2.78093	2.36857	2.00903	2.13036	1.97464	2.0482	1.19415	1.18125	1.26007	1.14782
			GG	Incubation time (Days)	>2mm	>2mm	>2mm	>2mm	2-0.25mm	2-0.25mm	2-0.25mm	2-0.25mm	0.25-0.053mm	0.25-0.053mm	0.25-0.053mm	0.25-0.053mm	<0.053mm	<0.053mm	<0.053mm	<0.053mm
				1	16.6401	16.5862	14.3606	14.5627	21.4435	21.8392	21.3663	21.4194	10.5734	11.1521	11.0005	11.1478	10.6668	10.5872	10.3994	9.96229
				3	26.712	27.8163	26.3287	26.4347	36.7088	37.6622	35.71	36.823	21.5984	22.6424	23.1717	24.1097	17.3851	17.6275	17.3656	16.8399
				5	9.93172	9.8966	9.59134	9.49093	15.933	15.6854	16.0244	15.3473	8.94613	9.02583	9.21223	9.48823	6.93354	6.96371	6.8606	6.77551
				7	8.20693	8.18204	8.19743	8.55273	12.3022	12.4828	12.7145	11.5519	8.27392	8.53734	8.5129	8.91573	6.1077	6.40733	6.17378	5.91625
				9	6.1057	6.2521	6.45065	6.69221	11.4712	12.5198	12.1281	9.45933	6.06498	6.37791	6.18439	7.34917	6.08923	6.05172	4.897	4.55434
				16	5.29164	4.83533	5.13862	5.15593	7.78355	7.53081	7.52899	8.31511	3.89358	3.91134	3.52061	4.06298	2.93042	2.75873	2.88624	2.58432
				26	4.29789	4.35662	4.33332	4.3459	6.89556	7.09133	7.07501	6.83228	3.11582	2.88882	2.7914	2.75272	1.74684	1.6662	2.05774	1.79951
				36	3.65723	3.3253	3.31672	3.60437	5.81316	6.57657	5.59076	6.35866	2.32139	2.25805	2.26567	2.33948	1.68037	1.31843	1.4613	1.60465
				46	3.68038	3.81575	4.28931	3.82394	6.16958	6.01397	6.43936	5.89974	2.81467	2.60848	2.49768	2.79588	1.81456	1.52165	1.76253	1.6946
				56	2.84874	2.88295	2.81164	3.22072	5.40537	5.56534	5.26949	4.91939	1.89904	2.16357	2.21994	1.56079	1.7381	1.70727	1.41816	1.75449
			GC	Incubation time (Days)	>2mm	>2mm	>2mm	>2mm	2-0.25mm	2-0.25mm	2-0.25mm	2-0.25mm	0.25-0.053mm	0.25-0.053mm	0.25-0.053mm	0.25-0.053mm	<0.053mm	<0.053mm	<0.053mm	<0.053mm
				1	6.52414	6.31764	6.69314	6.97555	5.31496	5.23362	5.24854	5.41013	4.05698	4.18666	3.95802	3.61958	3.52559	2.77053	3.15054	2.86994
				3	11.7081	12.4427	12.1925	12.2048	9.66266	9.37537	9.47461	10.1285	7.34757	7.75812	7.85736	7.42008	6.25596	4.91739	5.3089	4.88476
				5	3.75842	3.96823	4.02091	4.14698	2.98895	2.86243	3.14158	3.36076	2.07495	1.91331	2.08711	1.88585	1.27892	1.21769	1.42345	1.22849
				7	3.10007	3.62148	3.32457	3.68078	2.68547	2.5945	2.73526	3.0915	1.92055	1.87077	1.91467	1.87212	1.26879	1.30409	1.34392	1.1588
				9	3.48747	2.57248	2.54778	2.75914	1.96905	2.04362	2.50477	2.81133	1.42555	1.46352	1.44476	1.44476	0.906294	0.713689	1.10759	0.897601
				16	2.76329	2.54424	2.43313	2.31199	1.7678	1.72727	1.80833	1.7955	1.24227	1.28736	1.10338	1.12432	0.752723	0.928961	0.763197	0.565556
				26	2.66322	2.43809	2.16494	2.86365	1.96172	1.92023	2.0032	1.99007	1.25788	1.32687	1.22992	1.54967	1.07004	1.38187	1.46763	1.10593
				36	1.76133	1.92659	1.87468	1.79896	1.30414	1.10079	1.30367	1.47559	0.722182	0.86172	0.884579	0.753138	0.669796	0.265947	0.285949	0.266423
				46	1.99088	2.00678	1.70568	1.86129	1.57224	1.46288	1.7818	1.47405	0.949336	1.01196	0.939701	0.923803	0.38328	0.430491	0.364973	0.460842
				56	1.63519	1.78852	1.39802	1.80433	1.46127	1.12109	0.820674	1.31622	0.390894	0.565777	0.840318	0.606023	0.223199	0.260092	0.134081	0.335794
					unit: mg CO2-C kg-1 d-1

## Sheet: NO2 fluxes
			CK	Incubation time (Days)	>2mm	>2mm	>2mm	>2mm	2-0.25mm	2-0.25mm	2-0.25mm	2-0.25mm	0.25-0.053mm	0.25-0.053mm	0.25-0.053mm	0.25-0.053mm	<0.053mm	<0.053mm	<0.053mm	<0.053mm
				1	20.444	21.221	21.8744	21.4813	24.4421	24.8827	25.3131	25.8349	32.04	30.9286	30.8878	29.8579	27.7631	23.8697	26.9717	26.5405
				3	48.2722	49.8395	48.1469	48.7673	72.0349	71.041	72.9142	72.5126	81.5375	70.3413	79.8456	80.8084	51.6682	55.088	53.0016	55.529
				5	6.64861	7.30031	6.76675	7.03816	18.6459	18.6885	18.4055	17.6605	17.8023	18.6509	18.5997	19.5504	3.0566	3.36456	3.20501	3.74328
				7	1.71297	1.88363	2.02263	1.73423	14.4396	14.0621	14.5687	13.9222	11.0151	10.421	9.79587	10.4518	1.12567	1.09154	1.07501	1.10181
				9	0.821738	0.840811	0.854473	0.890185	5.54752	4.90973	6.79079	5.37871	1.84532	1.88902	1.84248	1.97911	1.00111	0.89032	0.916833	0.903306
				16	0.405422	0.400808	0.412775	0.406287	0.876882	0.839684	0.879333	0.931092	0.741787	0.643747	0.765288	0.713096	0.419407	0.464246	0.444494	0.422723
				26	0.268811	0.285262	0.254216	0.248279	0.503207	0.433197	0.460904	0.534006	0.384834	0.457936	0.365167	0.362446	0.222427	0.24865	0.204492	0.196699
				36	0.223546	0.221242	0.203968	0.233015	0.444403	0.447474	0.35995	0.42073	0.419835	0.452464	0.477928	0.50915	0.39565	0.413053	0.422394	0.456047
				46	0.255342	0.257823	0.270725	0.299507	0.418852	0.475051	0.402601	0.43957	0.352357	0.362778	0.404834	0.326924	0.206215	0.270229	0.244797	0.276556
				56	0.0150607	0.0349483	0	0	0.0968362	0.174579	0.135638	0.114777	0.107406	0.0754188	0.130909	0.143287	0.0210409	0.026882	0.0971144	0
			GG	Incubation time (Days)	>2mm	>2mm	>2mm	>2mm	2-0.25mm	2-0.25mm	2-0.25mm	2-0.25mm	0.25-0.053mm	0.25-0.053mm	0.25-0.053mm	0.25-0.053mm	<0.053mm	<0.053mm	<0.053mm	<0.053mm
				1	26.5449	26.3273	25.583	27.7248	32.8461	32.5665	32.7662	33.3188	27.663	28.9126	29.1805	28.7935	28.4829	28.4748	28.6067	26.4882
				3	32.3284	29.895	33.0833	32.9218	46.3476	46.6291	45.2267	44.2381	52.849	55.9242	55.6164	57.1552	47.4206	47.5544	47.4595	46.3056
				5	11.6973	11.2569	11.0454	10.812	19.9269	18.7525	19.8245	17.85	29.9624	30.448	32.1415	32.2518	23.7029	23.765	22.7233	22.5668
				7	4.9045	4.4066	4.83879	4.78052	5.58292	4.61327	5.61565	4.00589	19.5535	20.5012	20.1128	21.8467	15.3238	16.0698	14.5493	14.6387
				9	1.10141	1.03481	1.28805	1.22969	1.81182	1.87683	1.84599	1.47749	10.3152	10.6681	10.7515	12.9635	12.4911	12.596	9.28299	8.94706
				16	0.600174	0.548737	0.57584	0.528628	0.805634	0.773431	0.822829	0.834195	0.983845	1.0312	0.990985	1.1026	0.801846	0.755217	0.806071	0.742102
				26	0.383776	0.356617	0.33615	0.350057	0.448852	0.421956	0.530591	0.475748	0.484539	0.453182	0.490574	0.453182	0.291148	0.269106	0.320668	0.276978
				36	0.262414	0.24543	0.226294	0.20321	0.365991	0.316356	0.430458	0.370895	0.304634	0.32114	0.338482	0.344582	0.221629	0.33621	0.210267	0.42077
				46	0.184648	0.178544	0.156867	0.0928339	0.215668	0.252667	0.158486	0.195611	0.0701607	0.000646175	0.0250635	0.0549622	0.0476121	0.0337839	0	0.00861917
				56	0	0	0	0	0	0	0	0	0	0	0	0	0	0	0	0
			GC	Incubation time (Days)	>2mm	>2mm	>2mm	>2mm	2-0.25mm	2-0.25mm	2-0.25mm	2-0.25mm	0.25-0.053mm	0.25-0.053mm	0.25-0.053mm	0.25-0.053mm	<0.053mm	<0.053mm	<0.053mm	<0.053mm
				1	0.597947	0.586201	0.595598	0.60626	0.648366	0.631379	0.657944	0.607164	0.77324	0.779023	0.723544	0.583309	0.414341	0.414522	0.437111	0.358501
				3	1.66443	1.70063	1.67869	1.67505	1.62069	1.6383	1.63886	1.65116	1.60895	1.63005	1.74828	1.55934	1.63019	1.55151	1.56186	1.54858
				5	0.957741	0.973014	0.964007	0.966748	0.888816	0.878438	0.890774	0.890383	0.827528	0.815388	0.800702	0.783471	0.749204	0.808143	0.81108	0.83164
				7	0.277429	0.277677	0.286975	0.292678	0.262799	0.252385	0.285239	0.286851	0.239863	0.211843	0.224117	0.221142	0.216926	0.210851	0.225481	0.214447
				9	0.28345	0.205682	0.225357	0.247823	0.214855	0.233067	0.245431	0.280127	0.187204	0.202625	0.193319	0.160218	0.0754046	0.217248	0.255002	0.215653
				16	0.238507	0.208635	0.214901	0.200621	0.179783	0.168563	0.174974	0.176723	0.169874	0.180949	0.17002	0.151514	0.125868	0.207469	0.157926	0.15574
				26	0.0658745	0.068761	0.0737466	0.0581336	0.0370102	0.043439	0.0665305	0.0486871	0.0463255	0.0501303	0.0481623	0.0349109	0.0416022	0.0234964	0.0162803	0.0144435
				36	0.149149	0.117813	0.114703	0.193642	0.140418	0.14293	0.130491	0.216845	0.123673	0.216606	0.16709	0.193163	0.178691	0.217921	0.240048	0.225456
				46	0.0154814	0	0	0	0	0	0	0	0	0	0	0	0	0	0	0
				56	0	0	0	0	0	0	0	0	0	0	0	0	0	0	0	0
				unit: μg N2O-N kg-1 d-1

## Sheet: Cumulative CO2 emission
		CK	Incubation time (Days)	>2mm	>2mm	>2mm	>2mm	2-0.25mm	2-0.25mm	2-0.25mm	2-0.25mm	0.25-0.053mm	0.25-0.053mm	0.25-0.053mm	0.25-0.053mm	<0.053mm	<0.053mm	<0.053mm	<0.053mm
			1	12.3776	12.8627	11.9093	12.3966	14.3162	14.1332	14.7457	14.6832	12.2956	10.5476	12.4156	11.7396	9.56377	8.69373	9.49939	9.59376
			3	48.6339	50.5306	46.8126	48.3542	56.16	55.8994	57.9129	57.3286	47.8775	41.8881	47.8269	46.4261	36.8486	35.8201	37.2929	37.8158
			5	80.5054	84.1623	78.0894	80.6319	95.8537	95.9722	98.7967	97.5295	80.2072	71.4459	80.2166	79.0881	60.1467	59.7865	61.0594	61.8538
			7	94.0533	98.9266	92.2545	94.9563	117.357	118.024	120.24	119.442	96.133	85.931	96.0584	95.5839	69.4422	68.9062	69.9935	70.7404
			9	104.87	109.876	103.614	106.229	136.528	137.805	138.292	137.757	108.188	95.9334	107.87	108.226	77.0822	76.0837	77.2009	78.1002
			16	137.447	140.838	136.959	140.114	192.123	194.379	191.02	189.53	139.165	123.7	140.324	141.585	98.5966	96.9686	98.6922	98.9592
			26	174.187	177.017	172.319	175.727	244.843	245.699	243.567	244.007	171.931	155.768	173.938	172.923	120.442	118.155	120.362	119.192
			36	203.162	207.076	199.892	204.692	287.777	289.558	285.71	287.872	198.624	181.427	199.638	197.511	137.091	135.248	136.952	136.831
			46	230.965	235.774	228.401	235.309	328.765	332.359	326.059	326.875	224.889	207.032	224.483	221.674	150.572	150.825	151.179	152.564
			56	258.178	264.697	254.803	263.511	362.79	365.726	360.743	357.578	248.882	231.44	247.57	244.48	164.092	164.522	164.814	166.245
		GG	Incubation time (Days)	>2mm	>2mm	>2mm	>2mm	2-0.25mm	2-0.25mm	2-0.25mm	2-0.25mm	0.25-0.053mm	0.25-0.053mm	0.25-0.053mm	0.25-0.053mm	<0.053mm	<0.053mm	<0.053mm	<0.053mm
			1	16.6401	16.5862	14.3606	14.5627	21.4435	21.8392	21.3663	21.4194	10.5734	11.1521	11.0005	11.1478	10.6668	10.5872	10.3994	9.96229
			3	59.9922	60.9887	55.0499	55.5601	79.5959	81.3405	78.4427	79.6619	42.7451	44.9466	45.1727	46.4052	38.7187	38.8019	38.1644	36.7645
			5	96.6359	98.7017	90.9699	91.4858	132.238	134.688	130.177	131.832	73.2896	76.6148	77.5565	80.0031	63.0373	63.3931	62.3906	60.38
			7	114.775	116.78	108.759	109.529	160.473	162.856	158.916	158.731	90.5097	94.1779	95.2817	98.4071	76.0786	76.7642	75.425	73.0717
			9	129.087	131.214	123.407	124.774	184.246	187.859	183.759	179.743	104.849	109.093	109.979	114.672	88.2755	89.2232	86.4958	83.5423
			16	168.978	170.02	163.969	166.243	251.638	258.036	252.559	241.953	139.704	145.106	143.946	154.615	119.844	120.06	113.737	108.528
			26	216.926	215.98	211.329	213.752	325.033	331.146	325.579	317.69	174.751	179.106	175.507	188.693	143.231	142.184	138.457	130.447
			36	256.701	254.39	249.579	253.503	388.577	399.486	388.908	383.645	201.937	204.841	200.792	214.154	160.367	157.108	156.052	147.468
			46	293.389	290.095	287.609	290.645	448.491	462.439	449.058	444.937	227.617	229.173	224.609	239.831	177.841	171.308	172.171	163.964
			56	326.035	323.589	323.114	325.868	506.365	520.335	507.602	499.033	251.185	253.034	248.197	261.614	195.605	187.453	188.075	181.209
		GC	Incubation time (Days)	>2mm	>2mm	>2mm	>2mm	2-0.25mm	2-0.25mm	2-0.25mm	2-0.25mm	0.25-0.053mm	0.25-0.053mm	0.25-0.053mm	0.25-0.053mm	<0.053mm	<0.053mm	<0.053mm	<0.053mm
			1	6.52414	6.31764	6.69314	6.97555	5.31496	5.23362	5.24854	5.41013	4.05698	4.18666	3.95802	3.61958	3.52559	2.77053	3.15054	2.86994
			3	24.7564	25.078	25.5788	26.1559	20.2926	19.8426	19.9717	20.9487	15.4615	16.1314	15.7734	14.6592	13.3071	10.4584	11.61	10.6246
			5	40.223	41.4889	41.7923	42.5076	32.9442	32.0804	32.5879	34.4379	24.8841	25.8029	25.7179	23.9652	20.842	16.5935	18.3423	16.7379
			7	47.0815	49.0786	49.1377	50.3354	38.6186	37.5374	38.4647	40.8902	28.8796	29.587	29.7196	27.7231	23.3897	19.1153	21.1097	19.1252
			9	53.669	55.2725	55.0101	56.7753	43.2731	42.1755	43.7048	46.793	32.2257	32.9212	33.0791	31.04	25.5648	21.1331	23.5612	21.1816
			16	75.5466	73.1811	72.4433	74.5243	56.3521	55.3736	58.8006	62.9169	41.563	42.5493	41.9976	40.0318	31.3714	26.8823	30.109	26.3026
			26	102.679	98.0927	95.4336	100.402	74.9997	73.6111	77.8583	81.8448	54.0638	55.6204	53.664	53.4018	40.4852	38.4365	41.2631	34.6601
			36	124.802	119.916	115.632	123.716	91.329	88.7162	94.3926	99.1731	63.9641	66.5634	64.2365	64.9158	49.1843	46.6756	50.031	41.5218
			46	143.563	139.583	133.534	142.017	105.711	101.535	109.82	113.921	72.3217	75.9318	73.3579	73.3005	54.4497	50.1578	53.2857	45.1581
			56	161.693	158.559	149.052	160.345	120.878	114.454	122.832	127.873	79.0229	83.8205	82.258	80.9497	57.4821	53.6107	55.7809	49.1413
			unit: mg CO2-C kg-1

## Sheet: Cumulative N2O emission
		CK	Incubation time (Days)	>2mm	>2mm	>2mm	>2mm	2-0.25mm	2-0.25mm	2-0.25mm	2-0.25mm	0.25-0.053mm	0.25-0.053mm	0.25-0.053mm	0.25-0.053mm	<0.053mm	<0.053mm	<0.053mm	<0.053mm
			1	20.444	21.221	21.8744	21.4813	24.4421	24.8827	25.3131	25.8349	32.04	30.9286	30.8878	29.8579	27.7631	23.8697	26.9717	26.5405
			3	89.1602	92.2815	91.8956	91.7298	120.919	120.806	123.54	124.182	145.617	132.198	141.621	140.524	107.195	102.827	106.945	108.61
			5	144.081	149.421	146.809	147.535	211.6	210.536	214.86	214.355	244.957	221.191	240.066	240.883	161.919	161.28	163.152	167.882
			7	152.443	158.605	155.599	156.308	244.685	243.287	247.834	245.938	273.775	250.262	268.462	270.885	166.102	165.736	167.432	172.727
			9	154.977	161.33	158.476	158.932	264.672	262.258	269.194	265.239	286.635	262.572	280.1	283.316	168.228	167.718	169.423	174.732
			16	159.272	165.675	162.911	163.47	287.158	282.381	296.039	287.323	295.69	271.437	289.228	292.739	173.2	172.459	174.188	179.374
			26	162.644	169.106	166.246	166.743	294.058	288.746	302.74	294.649	301.323	276.945	294.88	298.116	176.409	176.023	177.433	182.471
			36	165.105	171.638	168.537	169.149	298.796	293.149	306.845	299.423	305.346	281.497	299.095	302.474	179.5	179.332	180.567	185.734
			46	167.5	174.034	170.91	171.812	303.113	297.762	310.658	303.724	309.207	285.574	303.509	306.655	182.509	182.748	183.903	189.397
			56	168.852	175.497	172.264	173.309	305.691	301.01	313.349	306.496	311.506	287.765	306.188	309.006	183.645	184.234	185.613	190.78
		GG	Incubation time (Days)	>2mm	>2mm	>2mm	>2mm	2-0.25mm	2-0.25mm	2-0.25mm	2-0.25mm	0.25-0.053mm	0.25-0.053mm	0.25-0.053mm	0.25-0.053mm	<0.053mm	<0.053mm	<0.053mm	<0.053mm
			1	26.5449	26.3273	25.583	27.7248	32.8461	32.5665	32.7662	33.3188	27.663	28.9126	29.1805	28.7935	28.4829	28.4748	28.6067	26.4882
			3	85.4182	82.5496	84.2493	88.3714	112.04	111.762	110.759	110.876	108.175	113.749	113.977	114.742	104.386	104.504	104.673	99.2819
			5	129.444	123.701	128.378	132.105	178.314	177.144	175.81	172.964	190.986	200.122	201.735	204.149	175.51	175.823	174.856	168.154
			7	146.046	139.365	144.262	147.698	203.824	200.509	201.251	194.82	240.502	251.071	253.99	258.248	214.537	215.658	212.128	205.36
			9	152.052	144.806	150.389	153.708	211.219	207	208.712	200.303	270.371	282.24	284.854	293.058	242.352	244.324	235.961	228.946
			16	158.007	150.349	156.913	159.862	220.38	216.275	218.053	208.394	309.918	323.187	325.953	342.289	288.877	291.053	271.272	262.858
			26	162.927	154.876	161.473	164.255	226.653	222.252	224.82	214.944	317.26	330.609	333.361	350.068	294.342	296.175	276.906	267.953
			36	166.158	157.886	164.285	167.022	230.727	225.944	229.625	219.177	321.206	334.481	337.506	354.057	296.906	299.201	279.561	271.442
			46	168.393	160.006	166.201	168.502	233.635	228.789	232.57	222.01	323.08	336.09	339.324	356.055	298.252	301.051	280.612	273.589
			56	169.316	160.898	166.985	168.966	234.713	230.052	233.363	222.988	323.43	336.093	339.449	356.329	298.49	301.22	280.612	273.632
		GC	Incubation time (Days)	>2mm	>2mm	>2mm	>2mm	2-0.25mm	2-0.25mm	2-0.25mm	2-0.25mm	0.25-0.053mm	0.25-0.053mm	0.25-0.053mm	0.25-0.053mm	<0.053mm	<0.053mm	<0.053mm	<0.053mm
			1	0.597947	0.586201	0.595598	0.60626	0.648366	0.631379	0.657944	0.607164	0.77324	0.779023	0.723544	0.583309	0.414341	0.414522	0.437111	0.358501
			3	2.86033	2.87303	2.86988	2.88757	2.91742	2.90106	2.95475	2.86548	3.15543	3.1881	3.19537	2.72596	2.45888	2.38056	2.43608	2.26558
			5	5.4825	5.54667	5.51257	5.52937	5.42693	5.41779	5.48438	5.40702	5.59191	5.63354	5.74435	5.06877	4.83827	4.74022	4.80902	4.6458
			7	6.71767	6.79736	6.76356	6.7888	6.57854	6.54862	6.66039	6.58425	6.6593	6.66077	6.76917	6.07338	5.8044	5.75921	5.84558	5.69189
			9	7.27855	7.28072	7.27589	7.3293	7.0562	7.03407	7.19106	7.15123	7.08637	7.07524	7.18661	6.45474	6.09673	6.18731	6.32606	6.12199
			16	9.1054	8.73083	8.81679	8.89885	8.43743	8.43978	8.66248	8.75021	8.33614	8.41775	8.45829	7.54581	6.80119	7.67382	7.77131	7.42186
			26	10.6273	10.1178	10.26	10.1926	9.5214	9.49979	9.87	9.87726	9.41714	9.57314	9.54921	8.47793	7.63854	8.82865	8.64234	8.27278
			36	11.7024	11.0507	11.2023	11.4515	10.4085	10.4316	10.8551	11.2049	10.2671	10.9068	10.6255	9.6183	8.74001	10.0357	9.92398	9.47228
			46	12.5256	11.6397	11.7758	12.4197	11.1106	11.1463	11.5076	12.2891	10.8855	11.9899	11.4609	10.5841	9.63346	11.1253	11.1242	10.5996
			56	12.603	11.6397	11.7758	12.4197	11.1106	11.1463	11.5076	12.2891	10.8855	11.9899	11.4609	10.5841	9.63346	11.1253	11.1242	10.5996
			unit: μg N2O-N kg-1

## Sheet: the ratio of CO2 to SOC
			the ratio of CO2/SOC (%)	>2mm	>2mm	>2mm	>2mm	2-0.25mm	2-0.25mm	2-0.25mm	2-0.25mm	0.25-0.053mm	0.25-0.053mm	0.25-0.053mm	0.25-0.053mm	<0.053mm	<0.053mm	<0.053mm	<0.053mm
			CK	0.508264	0.519573	0.495225	0.529379	0.650253	0.684466	0.64221	0.650804	0.47531	0.456991	0.465732	0.484434	0.456811	0.518478	0.489505	0.475086
			GG	0.605392	0.584791	0.666127	0.618967	0.865194	0.866809	0.985062	0.847498	0.517376	0.520422	0.591462	0.488852	0.616344	0.509433	0.600639	0.531635
			GC	0.431393	0.441422	0.425546	0.394859	0.310174	0.300998	0.406075	0.406484	0.279062	0.310745	0.287314	0.275981	0.214654	0.204476	0.223554	0.21689

## Sheet: the ratio of N2O to TN
				the ratio of N2O/TN (% ×10-2)	>2mm	>2mm	>2mm	>2mm	2-0.25mm	2-0.25mm	2-0.25mm	2-0.25mm	0.25-0.053mm	0.25-0.053mm	0.25-0.053mm	0.25-0.053mm	<0.053mm	<0.053mm	<0.053mm	<0.053mm
				CK	0.327868	0.379044	0.353725	0.337177	0.569257	0.593708	0.591224	0.595137	0.684629	0.581343	0.717068	0.695959	0.540133	0.583018	0.554069	0.541989
				GG	0.337957	0.312424	0.331978	0.342037	0.457531	0.407172	0.433759	0.415247	0.72518	0.692976	0.827924	0.761388	0.833772	0.751173	0.885211	0.731636
				GC	0.0321505	0.0357047	0.0348396	0.0352833	0.0353842	0.0340865	0.0388769	0.0384036	0.0410774	0.0389281	0.0360406	0.0356368	0.0366291	0.0432893	0.0461586	0.0346391
