# Supplementary material for: Conversion of alpine pastureland to artificial grassland altered CO 2 and N 2 O emissions by decreasing C and N in different soil aggregates
Source: PeerJ journal article supplement (doi:10.7717/peerj.11807), 2021-07-14
Supplement: Supplemental_Figure_S2.pdf [file Supplemental_Figure_S2.pdf]

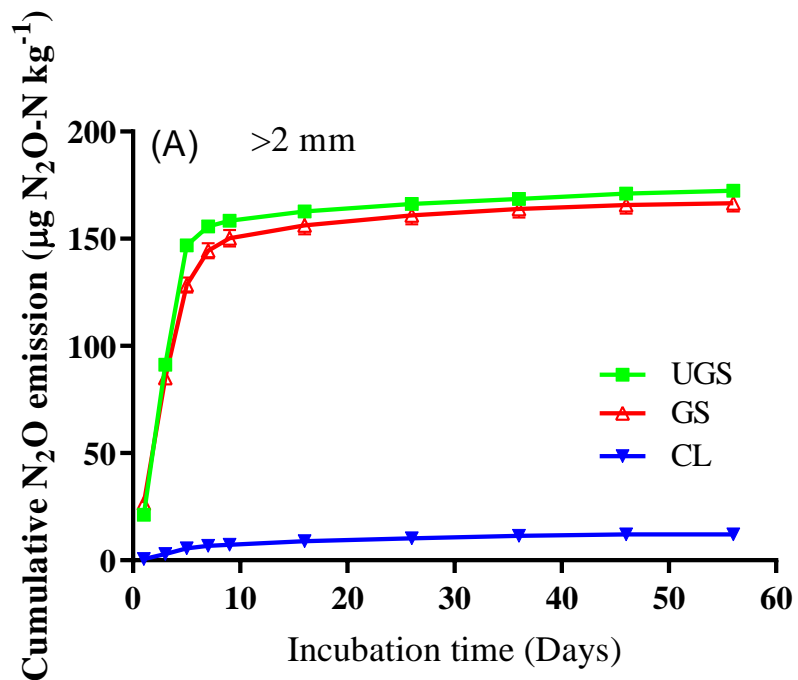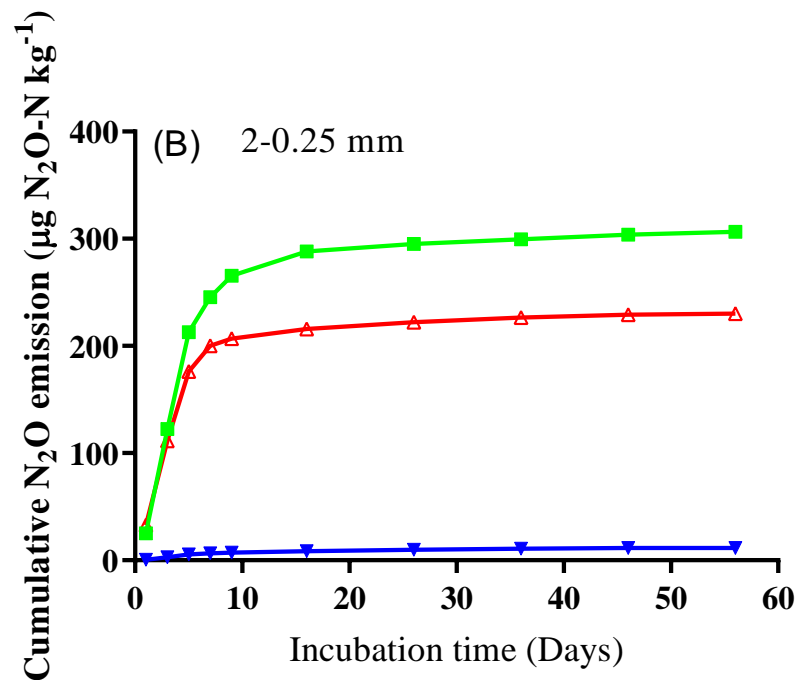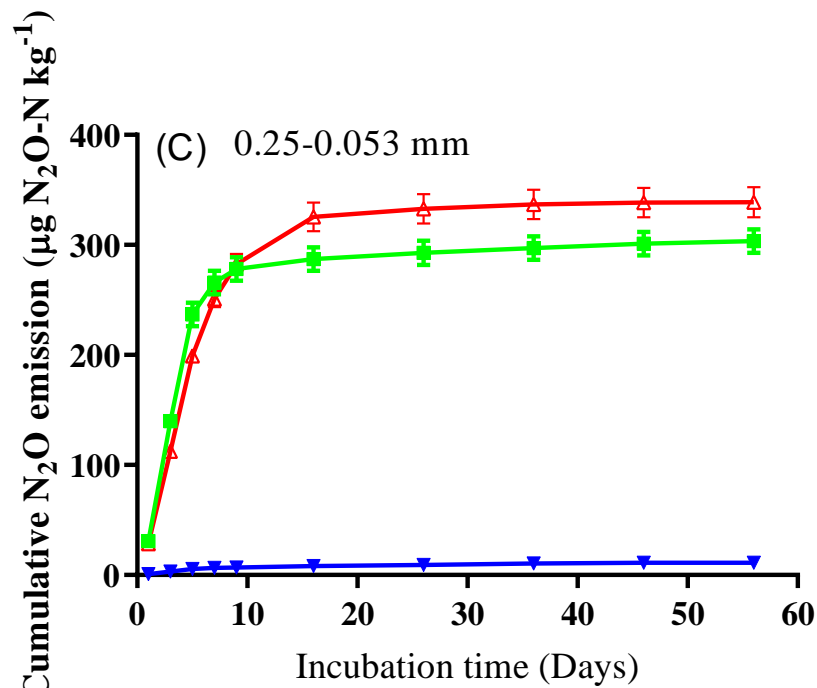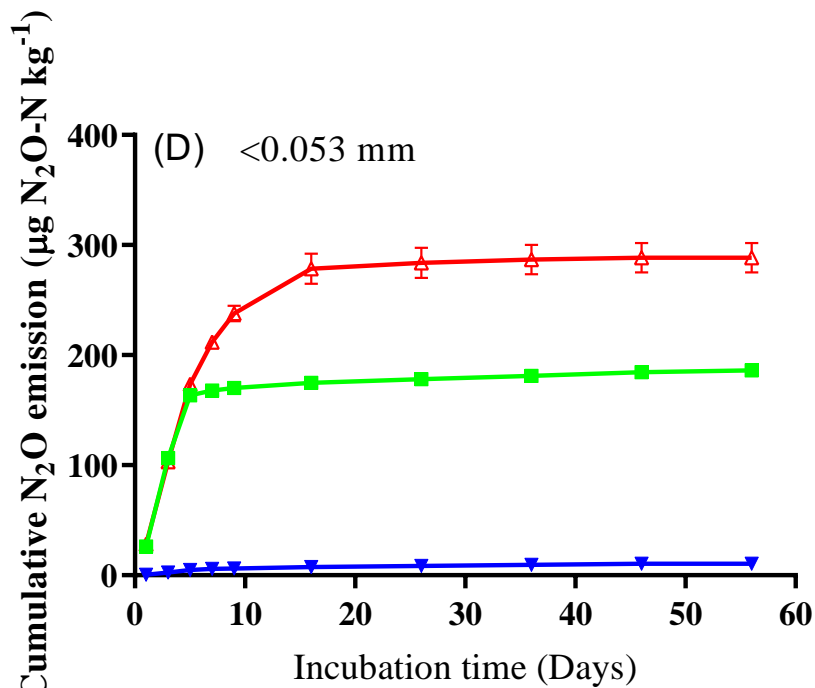

Legend: CK (green square), GG (red triangle), GC (blue inverted triangle)
